# Supplementary material for: An exploration of strategies used by dressage horses to control moments around the center of mass when performing passage
Source: PeerJ. 2017 Sep 28;5:e3866. doi: 10.7717/peerj.3866 (PMC5623309; doi:10.7717/peerj.3866)
Supplement: Supplemental Information 1 — Raw data and calculated variables. [file peerj-05-3866-s001.xlsx]

## Sheet: Info
		LFRH	RFLH	Mass	Trunk Inc		COP Ratio
1	Tando	2	2	613	101	11	0.593012
2	Queba	3	4	612	101.79	11.79	0.600102
3	Quemacho	5	4	597	103	13	0.599967
		10	10	607.333		11.93	0.597694
				8.96289		1.00732	0.00405525

## Sheet: Speed
SPEED LFRH
Horse
1	1.27591
1	1.373
3	0.897003
3	1.11922
3	1.01346
3	0.914256
3	1.23217
2	1.36318
2	1.35858
2	1.37232
SPEED RFLH
Horse
1	1.26837
1	1.40541
3	0.945445
3	1.191
3	1.02288
3	1.14902
2	1.28504
2	1.493
2	1.414
2	1.37915			-
	1.22362
	0.183318

## Sheet: MGRF
COM Moments (Nm/kg)
MGRF Br LFRH				MGRF Pr LFRH
Horse				Horse
1	-175.578	-0.286424		1	241.075	0.393271
1	-72.2947	-0.117936		1	51.7371	0.0843999
3	302.51	0.506717		3	-143.484	-0.240341
3	102.615	0.171885		3	33.3157	0.0558051
3	183.814	0.307897		3	-94.2611	-0.157891
3	203.668	0.341153		3	39.2617	0.065765
3	313.694	0.52545		3	-331.462	-0.555213
2	441.508	0.721418		2	-594.387	-0.971221
2	451.848	0.738314		2	-283.865	-0.463832
2	461.505	0.754093		2	-169.895	-0.277606
MGRF Br RFLH				MGRF Pr RFLH
Horse				Horse
1	32.5916	0.0531674		1	109.13	0.178026
1	157.608	0.257109		1	75.5061	0.123175
3	134.939	0.226028		3	-307.123	-0.514444
3	183.469	0.307318		3	-112.887	-0.18909
3	179.729	0.301054		3	-127.901	-0.21424
3	113.403	0.189954		3	-265.741	-0.445128
2	332.856	0.543882		2	-95.7378	-0.156434
2	686.276	1.12137		2	-248.421	-0.405917
2	318.129	0.519819		2	-64.665	-0.105662
2	334.749	0.546975		2	47.813	0.0781259
		0.386462				-0.185923
		0.32286				0.316405

## Sheet: Trunk
Trunk ROM and Trunk Inc (+VE = nose down for trunk inc) (degrees)
TRUNKINCMAXLF		TRUNKINCMINLF
					Trunk ROM		Mean Trunk Inc LFRH
Horse		Horse					Horse	X
1	-96.3984	1	-98.3789		1.9805		1	-97.2268	7.22678
1	-96.6494	1	-98.1874		1.53802		1	-97.5159	7.51588
3	-96.0712	3	-98.395		2.32388		3	-97.0859	7.08594
3	-95.5965	3	-97.5438		1.9473		3	-96.7239	6.72395
3	-96.2329	3	-97.9785		1.7456		3	-97.3411	7.34106
3	-94.7837	3	-96.5195		1.73587		3	-95.5743	5.57427
3	-98.2658	3	-94.517		3.74883		3	-96.3007	6.30067
2	-103.016	2	-98.4047		4.61108		2	-100.504	10.5044
2	-98.7199	2	-101.028		2.30835		2	-100.063	10.0625
2	-100.96	2	-97.7294		3.2308		2	-99.1767	9.17665
TRUNKINCMAXRF		TRUNKINCMINRF					Mean Trunk Inc RFLH
Horse		Horse					Horse	X
1	-96.3807	1	-98.0316		1.65082		1	-97.0313	7.03131
1	-97.6038	1	-99.5174		1.91357		1	-98.5207	8.52072
3	-94.3315	3	-100.089		5.75787		3	-97.3835	7.38351
3	-95.5856	3	-98.7866		3.20099		3	-97.3257	7.32568
3	-95.4677	3	-98.6459		3.17816		3	-97.3356	7.33565
3	-99.6424	3	-96.7032		2.93924		3	-98.2702	8.27024
2	-100.8	2	-98.2827		2.51772		2	-99.6137	9.6137
2	-97.4083	2	-101.585		4.177		2	-99.4023	9.40233
2	-99.7377	2	-97.8819		1.85579		2	-98.7822	8.78223
2	-100.419	2	-98.5995		1.81911		2	-99.3308	9.33083
					2.70903				8.02542
					1.14506				1.33598

## Sheet: COM Posn
COM Location (ratio)
MEAN COM POSITION LFRH			LFCOP LMAX			RHCOP LMAX			COM Location
Horse	X		Horse	X		Horse	X
1	0.770941		1	0.189592		1	1.47508		0.452239
1	-0.655054		1	-1.17366		1	0.128055		0.398403
3	-0.975539		3	-1.51486		3	-0.159573		0.397939
3	1.1775		3	0.595783		3	1.81445		0.477343
3	0.074056		3	-0.481636		3	0.797711		0.434356
3	-0.930137		3	-1.49806		3	-0.20175		0.438106
3	0.157657		3	0.765986		3	-0.523528		0.471751
2	0.058577		2	0.559774		2	-0.696763		0.398872
2	-0.992553		2	-1.54483		2	-0.230332		0.420142
2	-0.036101		2	0.450922		2	-0.756992		0.403193
MEAN COM POSITION RFLH			RFCOP RMAX			LHCOP RMAX
Horse	X		Horse	X		Horse	X
1	0.043338		1	-0.543884		1	0.805653		0.435128
1	-1.38859		1	-1.90872		1	-0.565704		0.387285
3	-0.474829		3	-1.0233		3	0.152449		0.466486
3	0.621107		3	0.086381		3	1.33087		0.429675
3	-0.449942		3	-1.02411		3	0.249843		0.450697
3	0.80791		3	1.35327		3	0.097365		0.434237
2	-0.71065		2	-0.190535		2	-1.57427		0.375879
2	-0.223127		2	-0.730818		2	0.563158		0.39235
2	-0.797203		2	-0.247498		2	-1.59511		0.407911
2	0.69077		2	1.21724		2	-0.148102		0.385595
								Total	0.422879
									0.030604

## Sheet: COP Posn
COP MEAN LFRH			LFCOP LMAX			RHCOP LMAX			COP Location
Horse	X		Horse	X		Horse	X
1	0.827976		1	0.189592		1	1.47508		0.496607
1	-0.656161		1	-1.17366		1	0.128055		0.397552
3	-0.921483		3	-1.51486		3	-0.159573		0.437825
3	1.18819		3	0.595783		3	1.81445		0.486113
3	0.08823		3	-0.481636		3	0.797711		0.445435
3	-0.853057		3	-1.49806		3	-0.20175		0.497567
3	0.17905		3	0.765986		3	-0.523528		0.455161
2	0.039073		2	0.559774		2	-0.696763		0.414394
2	-1.07261		2	-1.54483		2	-0.230332		0.359236
2	0.008981		2	0.450922		2	-0.756992		0.365871
COP MEAN RFLH			RFCOP RMAX			LHCOP RMAX
Horse	X		Horse	X		Horse	X
1	0.045405		1	-0.543884		1	0.805653		0.43666
1	-1.378		1	-1.90872		1	-0.565704		0.395171
3	-0.561412		3	-1.0233		3	0.152449		0.392845
3	0.666969		3	0.086381		3	1.33087		0.466527
3	-0.415552		3	-1.02411		3	0.249843		0.477691
3	0.830209		3	1.35327		3	0.097365		0.416481
2	-0.759009		2	-0.190535		2	-1.57427		0.410827
2	-0.168016		2	-0.730818		2	0.563158		0.43494
2	-0.79672		2	-0.247498		2	-1.59511		0.407553
2	0.713588		2	1.21724		2	-0.148102		0.368883
								Total	0.428167
									0.0426076

## Sheet: Timings
Timings
	RFLIFT	LFON	RHON	LFMAX	RHMAX	RHLIFT	LFLIFT	RFON	LHON	RFMAX	LHMAX	LHLIFT	RFLIFT	LFON	RHON	LFMAX	RHMAX	RHLIFT	LFLIFT	RFON	LHON	RFMAX	LHMAX	LHLIFT	RFLIFT	ON
1	1	1.025	1	1.25833	1.25	1.54167	1.51667	1.56667	1.525	1.725	1.75833	2.06667	2.1
1	2.1	2.09167	2.075	2.36667	2.33333	2.61667	2.65	2.65	2.61667	2.9	2.86667	3.14167	3.18333
2							3.61667	3.66667	3.59167	3.81667	3.76667	4.09167	4.125	4.15833	4.11667	4.38333	4.325	4.59167	4.65
2	1.64167	1.71667	1.675	1.86667	1.85	2.175	2.18333	2.24167	2.175	2.39167	2.39167	2.7	2.71667
2	2.71667	2.74167	2.71667	2.967	2.908	3.21667	3.24167	3.3	3.21667	3.44	3.42	3.74167	3.783
2	3.78333	3.79167	3.76667	4.04167	3.98	4.29167	4.28333
2	2.275	2.38333	2.325	2.525	2.48333	2.775	2.81667	2.825	2.825	3.09167	3	3.275	3.3
3							1.13333	1.175	1.15	1.39167	1.33333	1.625	1.675	1.68333	1.69167	1.925	1.89167	2.08333	2.2
3							2.4	2.475	2.45833	2.69167	2.60833	2.85833	2.91667	2.98333	3	3.2	3.15	3.425	3.46667
3							1.68333	1.74167	1.74167	1.96667	1.9	2.19167	2.2	2.25833	2.25833	2.5	2.43333	2.725	2.775	2.78333	2.8	3.0167	2.9667	3.24167	3.25833	3.28
LFRH
Horse	Step time	Time to Max F (%diagonal)	Time to Max H (% diagonal)	Dissociation	Suspension
1	0.516667	0.499999	0.500001	0.025
1	0.55	0.530304	0.487142	0.016667	-0.025
2	0.525	0.507935	0.410157	0.041666	-0.008333
2	0.541666	0.353847	0.494564	0.041667
2	0.525	0.476825	0.401265	0.025	0
2	0.5	0.55	0.387878	0.025	-0.016666
2	0.541667	0.369231	0.428819	0.058333	0.05
3	0.525	0.460318	0.452587	-0.008334	0.008333
3	0.55	0.39394	0.423077	-0.016667	0.066666
3	0.516667	0.467742	0.374138	0	0.058333
RFLH
Horse
1	0.583333	0.342857	0.4	0.041667	-0.016667
1	0.533333	0.53125	0.46875	0.033333	-0.033333
2	0.508333	0.442623	0.344263	0.075	-0.025
2	0.533334	0.40625	0.40625	0.066667	-0.008333
2	0.541333	0.412561	0.375615	0.083333	-0.025
2	0.483333	0.551725	0.362069	0	0.008333
3	0.541667	0.446154	0.338461	0.025	0.016667
3	0.516667	0.451614	0.290322	0.016667	0.058333
3	0.516667	0.435484	0.306451	0	0.058334
3	0.483333	0.482829	0.37938	-0.016667	0.021667
	0.52665	0.455674	0.401559	0.0266666	0.010463
	0.023497	0.0627521	0.0591319	0.0291949	0.0340836

## Sheet: Limb Angles
Mean LIMB ANGLES DURING STANCE (-VE = BRAKING ANGLE, +VE = PROPULSIVE ANGLE)
LF LIMB ANGLE MEAN		Degrees		RH LIMB ANGLE MEAN		Degrees
Horse				Horse
1	-0.060306	-3.45528		1	-0.006511	-0.373053
1	-0.026513	-1.51908		1	0.019595	1.12271
3	-0.108458	-6.21419		3	0.034863	1.9975
3	-0.117249	-6.71787		3	-0.08105	-4.64382
3	-0.140144	-8.02966		3	-0.036761	-2.10625
3	-0.140144	-8.02966		3	-0.023102	-1.32365
3	-0.122856	-7.03913		3	-0.062008	-3.5528
2	-0.112774	-6.46147		2	-0.067734	-3.88087
2	-0.121652	-6.97015		2	-0.022376	-1.28205
2	-0.084255	-4.82746		2	-0.050944	-2.91888
RF LIMB ANGLE MEAN				LH LIMB ANGLE MEAN
Horse				Horse
1	-0.086436	-4.95242		1	0.005745	0.329164
1	-0.051786	-2.96712		1	0.006217	0.356208
3	-0.114856	-6.58076		3	-0.12484	-7.15281
3	-0.109878	-6.29555		3	-0.036461	-2.08906
3	-0.137105	-7.85554		3	-0.055932	-3.20467
3	-0.13217	-7.57278		3	-0.028458	-1.63052
2	-0.139649	-8.0013		2	0.014729	0.84391
2	-0.096924	-5.55334		2	-0.039947	-2.28879
2	-0.11314	-6.48244		2	-0.005941	-0.340394
2	-0.134641	-7.71436		2	0.011781	0.675002
						-1.57316
		-6.16198				2.25606
		1.813

## Sheet: GRFs
GRF (N/kg)
GRF LF VMAX				GRF RH VMAX				GRF LF Br				GRF LF Pr				GRF RH Br				GRF RH Pr
Horse				Horse				Horse				Horse				Horse				Horse
1	5479.19	8.93831		1	4370.12	7.12907		1	-626.251	-1.02162		1	111.053	0.181163		1	176.88	0.288548		1	726.196	1.18466
1	4864.26	7.93517		1	4463.56	7.2815		1	-524.872	-0.856235		1	244.171	0.398321		1	50.018	0.0815954		1	748.26	1.22065
3	5252.08	8.79745		3	4536.5	7.59883		3	-553.65	-0.927387		3	115.008	0.192643		3	334.106	0.559642		3	768.677	1.28757
3	5958.13	9.98012		3	4213.01	7.05697		3	-898.682	-1.50533		3	70.448	0.118003		3	-154.785	-0.259271		3	201.66	0.337789
3	5288.94	8.8592		3	4385.85	7.34648		3	-705.078	-1.18104		3	80.889	0.135492		3	53.4668	0.0895591		3	400.147	0.670262
3	5222.29	8.74755		3	4322.14	7.23977		3	-558.411	-0.935361		3	63.188	0.105843		3	110.352	0.184844		3	564.453	0.945482
3	5757.32	9.64376		3	4751.95	7.95972		3	-986.938	-1.65316		3	193.083	0.323422		3	51.208	0.0857755		3	627.38	1.05089
2	6083.62	9.94055		2	5052.86	8.2563		2	-818.787	-1.33789		2	129.884	0.212229		2	-133.85	-0.218709		2	305.603	0.499351
2	6629.27	10.8321		2	5317.26	8.68833		2	-1017.15	-1.66201		2	79.891	0.130541		2	-154.053	-0.251721		2	392.822	0.641866
2	6152.83	10.0536		2	4906.25	8.01675		2	-682.678	-1.11549		2	276.697	0.452119		2	-192.139	-0.313953		2	408.447	0.667397
GRF RF VMAX				GRF LH VMAX				GRF RF Br				GRF RF Pr				GRF LH Br				GRF LH Pr
Horse				Horse				Horse	X			Horse				Horse				Horse
1	5498.66	8.97008		1	4312.19	7.03458		1	-886.23	-1.44573		1	134.277	0.219049		1	-59.845	-0.0976264		1	421.112	0.686969
1	5418.09	8.83865		1	4312.13	7.03448		1	-573.7	-0.935889		1	224.64	0.36646		1	-68.359	-0.111515		1	646.973	1.05542
3	5515.26	9.23829		3	4688.23	7.85299		3	-685.486	-1.14822		3	136.621	0.228846		3	-161.804	-0.271028		3	106.8	0.178894
3	5421.02	9.08044		3	4486.45	7.51499		3	-488.525	-0.818301		3	141.357	0.23678		3	84.473	0.141496		3	382.324	0.640409
3	5515.26	9.23829		3	4415.16	7.39558		3	-660.95	-1.10712		3	120.3	0.201508		3	9.5215	0.0159489		3	346.435	0.580294
3	5161.38	8.64552		3	4326.42	7.24693		3	-567.566	-0.950697		3	165.85	0.277806		3	-14.0991	-0.0236166		3	356.995	0.597981
2	6214.97	10.1552		2	4832.64	7.89647		2	-573.303	-0.93677		2	186.264	0.304353		2	124.023	0.202652		2	753.906	1.26282
2	6957.89	11.3691		2	5293.82	8.65004		2	-666.748	-1.08946		2	248.644	0.406281		2	23.621	0.0385964		2	516.785	0.844419
2	6898.44	11.272		2	5084.72	8.30836		2	-709.717	-1.15967		2	126.635	0.20692		2	167.603	0.273861		2	582.642	0.952029
2	6508.91	10.6355		2	5003.91	8.17632		2	-748.23	-1.2226		2	108.878	0.177905		2	178.955	0.29241		2	603.76	0.986536
	5789.89	9.55854			4653.76	7.68422				-1.1467			149.942					0.0218461				0.805535
	605.388	0.940484			352.131	0.537545				0.259418			63.3665					0.230265				0.318612

## Sheet: Correlations
	Correlations
	Control Variables			MGRFABS	MGRFPROP	TrunkROM	TrunkInc	COM	Dissoc	TimetomaxF	TimetomaxH	ForeAngleTrans	Hindlimbangle	COP	GRFVFore	GRFVHind
	Horse	MGRFABS	Correlation	1	-0.316725	0.237088	0.0820668	-0.265602	0.125084	-0.0404444	-0.156113	0.289354	0.0371489	-0.0854549	0.181518	0.412366
			Significance (2-tailed)		0.186446	0.328414	0.73838	0.271758	0.609893	0.869423	0.523334	0.229536	0.879986	0.727962	0.457047	0.0793485
			df	0	17	17	17	17	17	17	17	17	17	17	17	17
		MGRFPROP	Correlation	-0.316725	1	-0.75384	-0.0656499	-0.272173	-0.263041	0.0967012	-0.079996	-0.0191678	0.546149	0.0676963	0.34765	-0.273889
			Significance (2-tailed)	0.186446		0.000193322	0.789452	0.259625	0.27658	0.693714	0.744769	0.93792	0.0155549	0.783036	0.144718	0.256514
			df	17	0	17	17	17	17	17	17	17	17	17	17	17
		TrunkROM	Correlation	0.237088	-0.75384	1	-0.000493069	0.345312	0.532346	-0.134357	-0.179844	0.142956	-0.729488	0.0109647	-0.125038	0.315881
			Significance (2-tailed)	0.328414	0.000193322		0.998402	0.147623	0.0189582	0.583428	0.46128	0.559327	0.000393424	0.964466	0.610027	0.187687
			df	17	17	0	17	17	17	17	17	17	17	17	17	17
		TrunkInc	Correlation	0.0820668	-0.0656499	-0.000493069	1	-0.634234	-0.528834	0.183058	0.203158	0.537614	0.299305	-0.650116	0.185838	0.330583
			Significance (2-tailed)	0.73838	0.789452	0.998402		0.00354066	0.019912	0.453174	0.404181	0.0175958	0.213187	0.00258388	0.446222	0.166853
			df	17	17	17	0	17	17	17	17	17	17	17	17	17
		COM	Correlation	-0.265602	-0.272173	0.345312	-0.634234	1	0.480543	-0.515437	0.0453042	-0.38548	-0.77086	0.506371	0.0705833	-0.135502
			Significance (2-tailed)	0.271758	0.259625	0.147623	0.00354066		0.03729	0.0239045	0.853885	0.103121	0.00011201	0.0269456	0.774008	0.580192
			df	17	17	17	17	0	17	17	17	17	17	17	17	17
		Dissoc	Correlation	0.125084	-0.263041	0.532346	-0.528834	0.480543	1	-0.468165	-0.331575	-0.31508	-0.514709	0.440475	-0.0556439	-0.0941036
			Significance (2-tailed)	0.609893	0.27658	0.0189582	0.019912	0.03729		0.0432229	0.165507	0.18887	0.0241382	0.0590984	0.821003	0.701577
			df	17	17	17	17	17	0	17	17	17	17	17	17	17
		TimetomaxF	Correlation	-0.0404444	0.0967012	-0.134357	0.183058	-0.515437	-0.468165	1	-0.0739495	-0.0157153	0.35502	-0.196141	-0.495624	-0.137888
			Significance (2-tailed)	0.869423	0.693714	0.583428	0.453174	0.0239045	0.0432229		0.763516	0.949086	0.135824	0.420947	0.030934	0.573477
			df	17	17	17	17	17	17	0	17	17	17	17	17	17
		TimetomaxH	Correlation	-0.156113	-0.079996	-0.179844	0.203158	0.0453042	-0.331575	-0.0739495	1	0.208074	-0.0334674	-0.00116454	-0.0421991	-0.0328577
			Significance (2-tailed)	0.523334	0.744769	0.46128	0.404181	0.853885	0.165507	0.763516		0.392653	0.89181	0.996225	0.863807	0.89377
			df	17	17	17	17	17	17	17	0	17	17	17	17	17
		ForeAngleTrans	Correlation	0.289354	-0.0191678	0.142956	0.537614	-0.38548	-0.31508	-0.0157153	0.208074	1	0.104415	-0.444294	0.410405	0.549832
			Significance (2-tailed)	0.229536	0.93792	0.559327	0.0175958	0.103121	0.18887	0.949086	0.392653		0.670544	0.0566807	0.0809304	0.0147348
			df	17	17	17	17	17	17	17	17	0	17	17	17	17
		Hindlimbangle	Correlation	0.0371489	0.546149	-0.729488	0.299305	-0.77086	-0.514709	0.35502	-0.0334674	0.104415	1	-0.237737	0.0252845	0.0321609
			Significance (2-tailed)	0.879986	0.0155549	0.000393424	0.213187	0.00011201	0.0241382	0.135824	0.89181	0.670544		0.327052	0.918165	0.896011
			df	17	17	17	17	17	17	17	17	17	0	17	17	17
		COP	Correlation	-0.0854549	0.0676963	0.0109647	-0.650116	0.506371	0.440475	-0.196141	-0.00116454	-0.444294	-0.237737	1	0.00178105	-0.393367
			Significance (2-tailed)	0.727962	0.783036	0.964466	0.00258388	0.0269456	0.0590984	0.420947	0.996225	0.0566807	0.327052		0.994226	0.0956735
			df	17	17	17	17	17	17	17	17	17	17	0	17	17
		GRFVFore	Correlation	0.181518	0.34765	-0.125038	0.185838	0.0705833	-0.0556439	-0.495624	-0.0421991	0.410405	0.0252845	0.00178105	1	0.428385
			Significance (2-tailed)	0.457047	0.144718	0.610027	0.446222	0.774008	0.821003	0.030934	0.863807	0.0809304	0.918165	0.994226		0.0672651
			df	17	17	17	17	17	17	17	17	17	17	17	0	17
		GRFVHind	Correlation	0.412366	-0.273889	0.315881	0.330583	-0.135502	-0.0941036	-0.137888	-0.0328577	0.549832	0.0321609	-0.393367	0.428385	1
			Significance (2-tailed)	0.0793485	0.256514	0.187687	0.166853	0.580192	0.701577	0.573477	0.89377	0.0147348	0.896011	0.0956735	0.0672651
			df	17	17	17	17	17	17	17	17	17	17	17	17	0

[truncated: 2 more sheets: Correlations1, Queba Graphs]
